# Supplementary material
Source: publisher site journal article supplement (https://www.spandidos-publications.com/1911/downloadSupplementary)

Figure S1. KCTD1 and AP-2 $\alpha$  mutant sequences. KCTD1 and AP-2 $\alpha$  sequences in recombinant plasmids were confirmed by Sanger sequencing analysis. KCTD1, potassium-channel tetramerization-domain-containing 1.

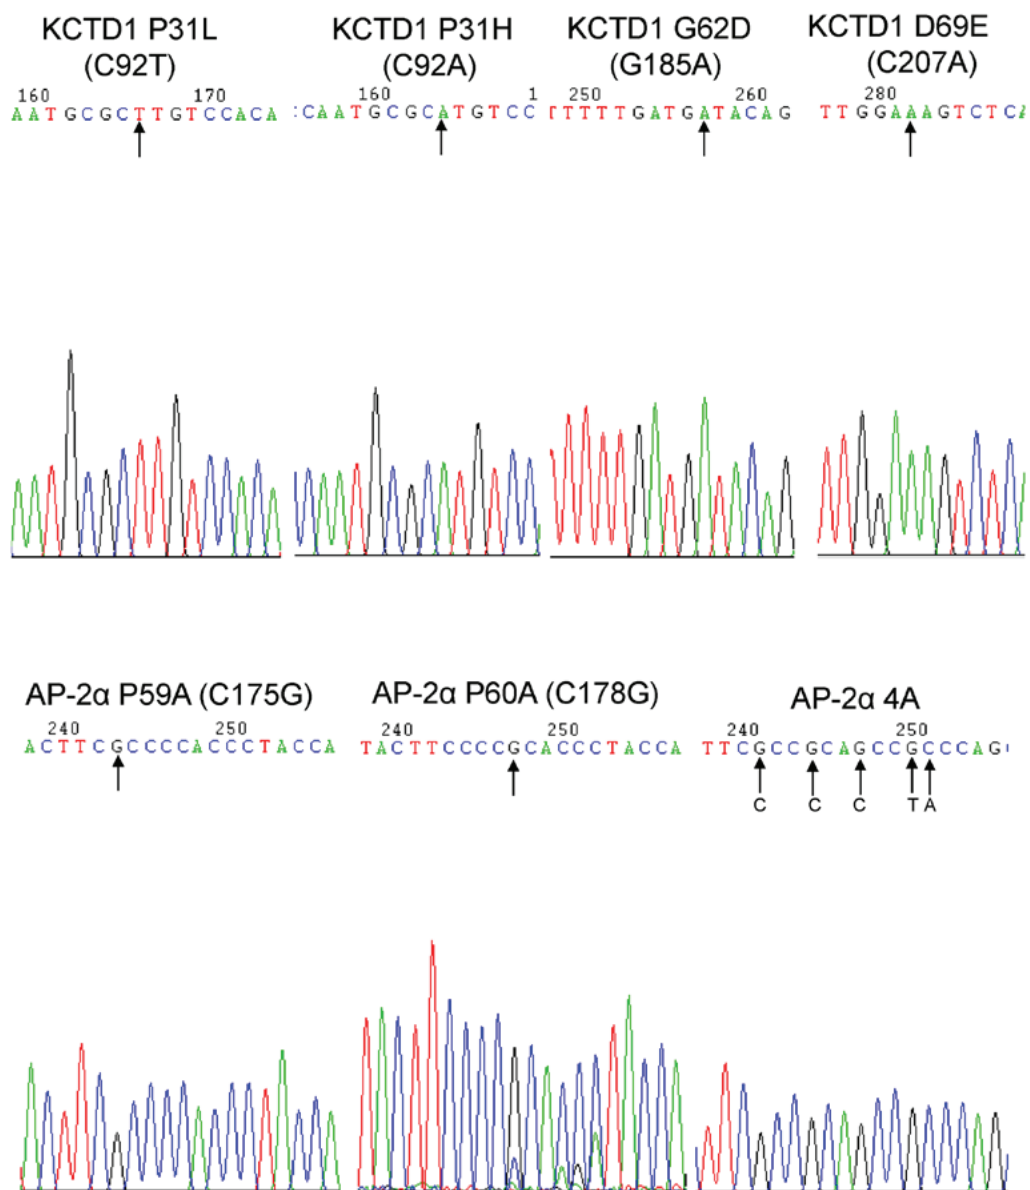

Supplement: Supplementary file 1 [file downloadSupplementary]
